# Supplementary material
Source: MDPI journal article supplement (https://www.mdpi.com/2073-4360/7/10/1491)
Supplement: s1 [file s1]

## Supplementary Materials

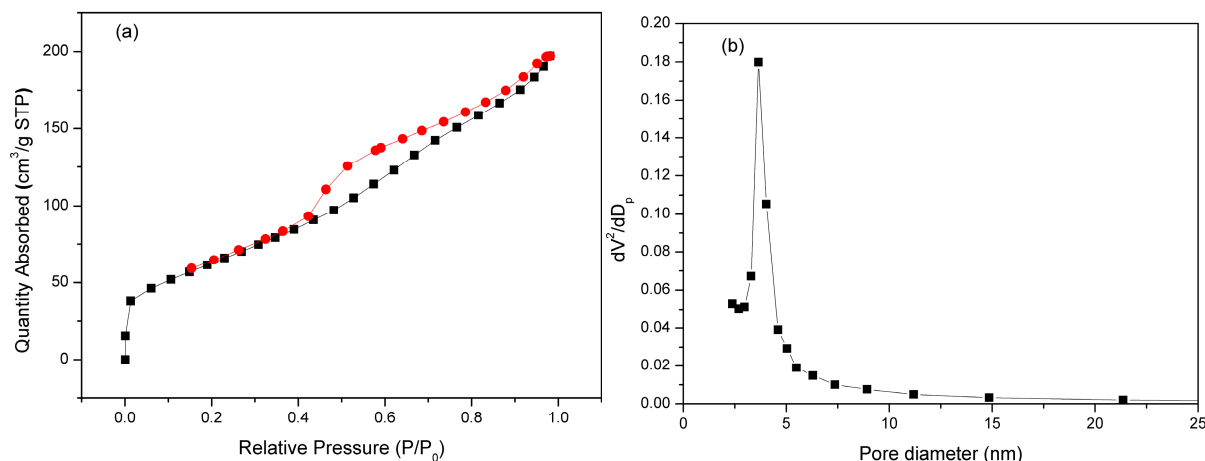

**Figure S1.** (a) N<sub>2</sub> adsorption/desorption isotherms and (b) Pore size distribution curves of MnO<sub>2</sub>.

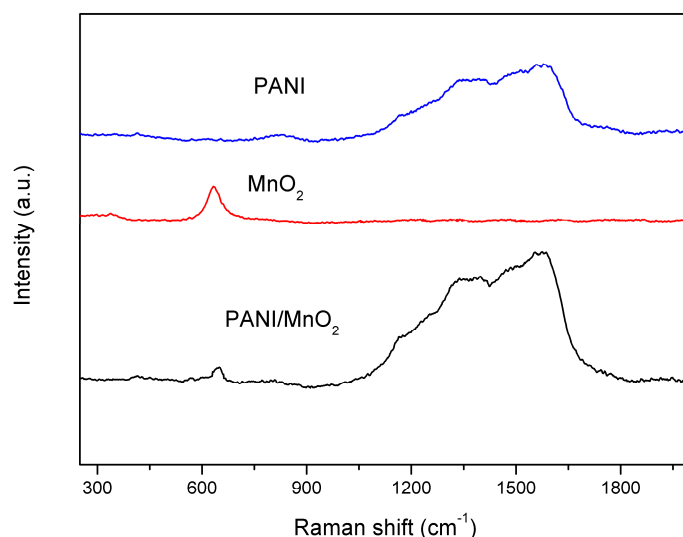

**Figure S2.** Raman spectroscopy of PANI, MnO<sub>2</sub>, PANI/MnO<sub>2</sub>

The N<sub>2</sub> adsorption/desorption isotherms and pore size distribution curves of MnO<sub>2</sub> was shown in Figure S1. As is shown in Figure 1a, it can be observed that the MnO<sub>2</sub> has a typical IV isotherm and display a distinct hysteresis loop of H1 in the range of 0.4–0.8 P/P<sub>0</sub>, indicating the presence of mesopores in the MnO<sub>2</sub> nanomaterial. The pore size distribution curves are exhibited in Figure 1b. It is easily found that the mean pore diameter of MnO<sub>2</sub> is 3.648 nm. The BET surface area of MnO<sub>2</sub> nanomaterial is 232.96 m<sup>2</sup>/g.

Raman spectroscopy was employed to analyze the PANI, MnO<sub>2</sub>, PANI/MnO<sub>2</sub> in Figure S2. The band which appears at 1170 cm<sup>-1</sup> corresponds to the C–H bending. The peaks at 1333 and 1555 cm<sup>-1</sup> can be assigned to the N–H bending and C–N<sup>+</sup> stretching vibrations, respectively. The presence of MnO<sub>2</sub> on the composites is confirmed by the slight peaks at 646 cm<sup>-1</sup> (corresponding to the pure MnO<sub>2</sub>), attributed to the Mn–O vibration. The decrease of the intensity may be due to the cladding of PANI.
